# Supplementary material
Source: Research Square preprint supplement (doi:10.21203/rs.3.rs-10366407/v1)
Supplement: Supplementary file 1 [file 110ea7e81531dec0413b0172.docx]

**APPENDIX 1: QUESTIONNNAIRE**

**Part-1: Demographic Information**

**Role:** ☐ Staff ☐ Graduate **Gender:** ☐ Male ☐ Female

**College Location:** ☐ Urban ☐ Rural

**Experience (Staff):** _____ years | **Years Since Graduation:** _____ months

**Instructions:** Please indicate your level of agreement using: 1=Strongly Disagree, 2=Disagree, 3=Neutral, 4=Agree, 5=Strongly Agree.

**Part-2: Dependent variables**

**Section 1: Participative Leadership (LEAD)**

**LEAD1:** The dean involves staff in making important decisions.

**LEAD2:** My suggestions are taken seriously by college leadership.

**LEAD3:** Staff and leaders set goals together at the start of each year.

**LEAD4:** Communication between leaders and staff is open and frequent.

**LEAD5:** The dean asks for input before implementing major changes.

**Section 2: Staff Commitment (COMM)**

**COMM1:** I feel a strong sense of belonging to this TVET College.

**COMM2:** I am willing to put in extra effort to achieve college goals.

**COMM3:** I am proud to tell others I work at this college.

**COMM4:** I would accept any reasonable assignment to help my college.

**Section 3: Industry Linkage (IND)**

**IND1:** Our College has active MOUs with local industries.

**IND2:** Employers regularly visit our college for recruitment.

**IND3:** Industry representatives participate in curriculum review.

**IND4:** Students secure internship placements through college-industry linkages.

**Section 4: Cooperative Training Quality (COOP)**

**COOP1:** Students spend at least 70% of training time in real workplaces.

**COOP2:** Industry supervisors provide regular, constructive feedback on student performance.

**COOP3:** The College regularly assesses and improves the quality of cooperative training.

**COOP4:** The College monitors cooperative training quality through structured evaluation.

**Section 5: Graduate Employment Outcomes (EMP)**

**EMP1:** Most graduates find employment within 12 months of graduation.

**EMP2:** Graduates work in fields related to their TVET training.

**EMP3:** Employers express satisfaction with our graduates' technical skills.

**EMP4:** Graduates secure formal sector employment after completing their training.

**Section 6: Graduate Entrepreneurship Outcomes (ENT)**

**ENT1:** Our TVET program effectively develops students' entrepreneurial skills and mindset.

**ENT2:** Graduates have started their own businesses within two years of graduation.

**ENT3:** I feel confident that I could successfully start and manage my own business.
