# Supplementary material
Source: Research Square preprint supplement (doi:10.21203/rs.3.rs-10366407/v1)
Supplement: Supplementary file 2 [file 40417d3caa29ff5a52934400.docx]

**Author Biography**

| 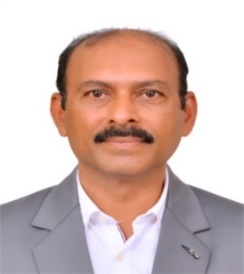 | **Dr. Srinivasa Chakravarthy Mekapotula** is a Professor in the Department of Management at the Federal Democratic Republic of Ethiopia Technical and Vocational Training Institute (FTVTI) in Addis Ababa, Ethiopia, where he currently teaches and mentors Ph.D. students. He holds an MBA and a Ph.D., and is APSET and National Eligibility Test (NET) qualified. With over 31 years of distinguished teaching experience alongside 7 years of industrial exposure, Dr. Mekapotula specializes in Human Resource Management, Leadership and Change Management, Operations Research, and Advanced Quantitative Research. A recognized expert in advanced data analytics, he possesses deep expertise in SPSS, AMOS, structural equation modeling (SEM), and STATA. His career spans prestigious global institutions, including Samara University and Acharya Nagarjuna University (India), where he has supervised numerous Ph.D. scholars and guided over 100 MBA dissertations. Additionally, he has adjudicated ten doctoral theses as an international foreign examiner. Dr. Mekapotula’s current research focuses on community development. ORCID is : <https://orcid.org/0009-0008-1426-1339> |
| --- | --- |
| 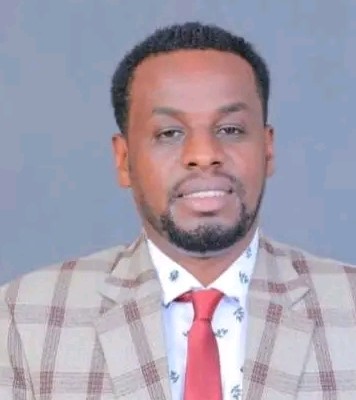 | **Ashenaf Argata Yona** is a doctoral candidate in Leadership and Management at Ethiopia Technical and Vocational Training Institute (FTVTI), Addis Ababa, Ethiopia. His research examines the emergence of innovation culture in public sector vocational education through the lens of strategic leadership, with a particular focus on Ethiopia's Technical and Vocational Education and Training (TVET) institutions. He holds a Master of Arts in Leadership and Management from Ethiopia Technical and Vocational Training Institute (FTVTI)and a Bachelor of Science in Civil Engineering from Hawassa University. He currently serves in Ethiopia's TVET sector (College dean in hawassa tegibaried polytechnic college), where he has developed expertise in teaching, academic leadership, and institutional development. His scholarly interests encompass educational leadership, innovation culture, entrepreneurship, youth employability, industry-academic linkages, and the transformation of TVET systems in Ethiopia.  ORCID is :<https://orcid.org/0009-0006-3887-1516> E-mail: ashenafargata36@gmail.com |
